# Supplementary material for: A Highly Accurate Inclusive Cancer Screening Test Using Caenorhabditis elegans Scent Detection
Source: PLOS journal article supplement (doi:10.1371/journal.pone.0118699), 2015-03-11
Supplement: S4 (10.1371/journal.pone.0118699.s004) [file journal.pone.0118699.s004]

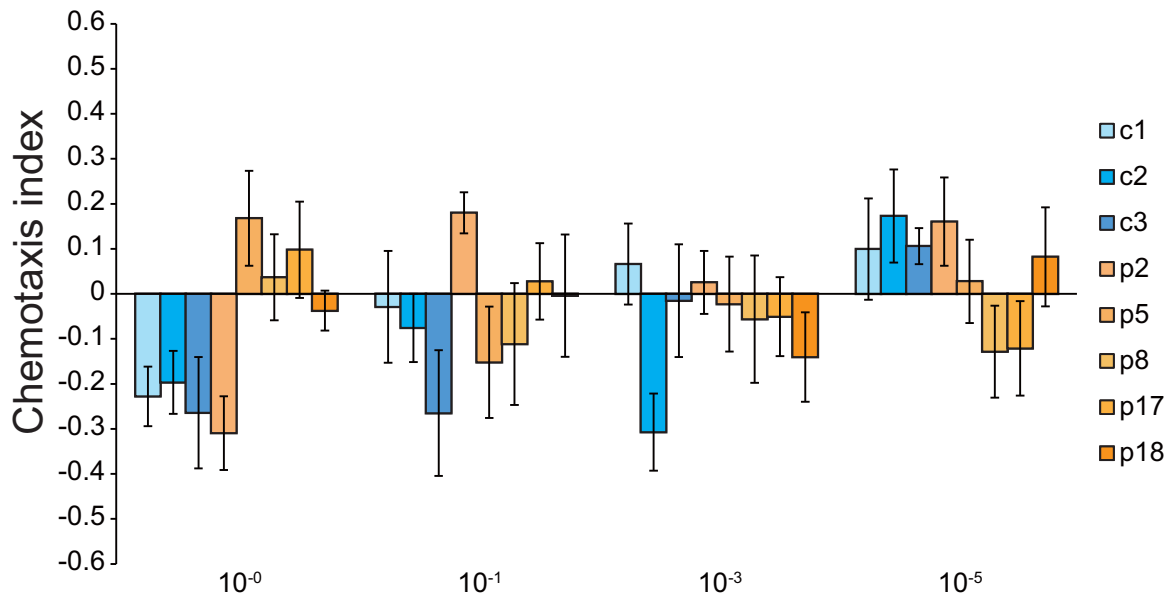

**S4 Fig. Chemotaxis of *C. elegans* in response to serum samples from control participants and patients with cancer.**

Chemotaxis of wild-type *C. elegans* in responses to various dilutions (10<sup>-0</sup>, 10<sup>-1</sup>, 10<sup>-3</sup> and 10<sup>-5</sup>) of serum samples from control participants (c1, c2 and c3) and patients with cancer (p2, p5, p8, p17 and p18), n ≥ 5 assays. Characteristics of participants are shown in S1 Table.
